# Supplementary material for: Structural equation modeling of parasympathetic and sympathetic response to traffic air pollution in a repeated measures study
Source: PubMed Central journal article supplement (PMC3907044; doi:10.1186/1476-069x-12-81), 2013-09-23
Supplement: 1476-069X-12-81-S3.pdf [file 1476-069X-12-81-S3.pdf]

### Additional File 3

**Additional Table 1.** Adjusted posterior estimates of % change in mean sympathetic tone marker (LF/HF) associated with an IQR<sup>a</sup> increase in traffic, by patient characteristics [diabetic status (doctor's diagnosis of diabetes or fasting blood glucose (FBG) >126 mg/dL, vs. no diagnosis or FBG ≤126 mg/dL), and obesity (body mass index (BMI) ≥ 30, <30)].

| STRUCTURAL EQUATION MODEL |                |                  |               |                                    |                 |                |                  |                |                                    |
|---------------------------|----------------|------------------|---------------|------------------------------------|-----------------|----------------|------------------|----------------|------------------------------------|
| Effect Modifier           | Moving average | % change in mean | 95% PI        | Posterior probability <sup>b</sup> | Effect Modifier | Moving average | % change in mean | 95% PI         | Posterior probability <sup>b</sup> |
| Diabetic                  | 4-hr           | -0.3             | (-24.1, 30.8) | 0.49                               | Diabetic        | 4-hr           | -28.2            | (-52.1, 6.8)   | 0.05                               |
|                           | 24-hr          | 7.5              | (-22.8, 49.4) | 0.67                               | Obese           | 24-hr          | -10.6            | (-41.9, 39.9)  | 0.31                               |
|                           | 48-hr          | 9.0              | (-21.5, 50.7) | 0.70                               |                 | 48-hr          | 1.8              | (-33.2, 58.5)  | 0.53                               |
|                           | 72-hr          | 16.8             | (-16.1, 64.0) | 0.82                               |                 | 72-hr          | 11.6             | (-27.8, -76.8) | 0.68                               |
| Non-Diabetic              | 4-hr           | 8.0              | (-6.5, 24.3)  | 0.86                               | Non-Diabetic    | 4-hr           | 15.3             | (-11.9, 51.0)  | 0.85                               |
|                           | 24-hr          | 7.1              | (-9.5, 26.3)  | 0.79                               | Obese           | 24-hr          | 4.9              | (-23.4, 41.0)  | 0.62                               |
|                           | 48-hr          | 5.8              | (-10.8, 25.5) | 0.75                               |                 | 48-hr          | -1.5             | (-30.5, 38.2)  | 0.47                               |
|                           | 72-hr          | 5.2              | (-11.1, 25.0) | 0.72                               |                 | 72-hr          | 0.1              | (-29.3, 43.0)  | 0.50                               |
| Obese                     | 4-hr           | 0.0              | (-20.7, 24.7) | 0.50                               | Diabetic        | 4-hr           | 32.1             | (-9.2, 91.3)   | 0.93                               |
|                           | 24-hr          | -0.1             | (-22.8, 28.2) | 0.50                               | Non-Obese       | 24-hr          | 32.5             | (-16.9, 110.8) | 0.88                               |
|                           | 48-hr          | 0.1              | (-23.9, 30.0) | 0.51                               |                 | 48-hr          | 18.7             | (-26.1, 93.6)  | 0.75                               |
|                           | 72-hr          | 4.4              | (-21.9, 39.3) | 0.62                               |                 | 72-hr          | 22.3             | (-25.1, 100.7) | 0.79                               |
| Non-Obese                 | 4-hr           | 9.4              | (-5.7, 27.8)  | 0.88                               | Non-Diabetic    | 4-hr           | 5.7              | (-10.8, 24.7)  | 0.74                               |
|                           | 24-hr          | 10.1             | (-8.1, 31.2)  | 0.86                               | Non-Obese       | 24-hr          | 7.6              | (-10.6, 29.9)  | 0.78                               |
|                           | 48-hr          | 8.8              | (-8.9, 29.7)  | 0.83                               |                 | 48-hr          | 7.6              | (-9.7, 28.9)   | 0.78                               |
|                           | 72-hr          | 8.0              | (-9.6, 29.6)  | 0.80                               |                 | 72-hr          | 6.3              | (-12.1, 28.6)  | 0.74                               |

<sup>a</sup> Interquartile range (IQR): 4-hr = 0.88; 24-hr = 0.52; 48-hr = 0.43; 72-hr = 0.36;

<sup>b</sup> Posterior probability that  $\gamma_I > 0$ .
